# Supplementary material for: Soil Inorganic Carbon as a Potential Sink in Carbon Storage in Dryland Soils—A Review
Source: MDPI journal article supplement (doi:10.3390/agriculture12081256), 2022-08-18
Supplement: s1 [file s1]

**Table S1.** Important studies included in the review

| <b>Main studies</b>     | <b>Main aim of the study (of our interest)</b>                                         | <b>Location of the experiment/dataset</b> | <b>doi/Links to refer</b>                                                                                                                           |
|-------------------------|----------------------------------------------------------------------------------------|-------------------------------------------|-----------------------------------------------------------------------------------------------------------------------------------------------------|
| Dalal et al. [2]        | Effect of land use on SOC fractions                                                    | Australia                                 | <a href="https://doi.org/10.1016/j.agee.2021.107326">https://doi.org/10.1016/j.agee.2021.107326</a> .                                               |
| Ahmad et al. [4]        | C dynamics from carbonate dissolution in croplands                                     | Australia                                 | <a href="https://doi.org/10.1071/sr14060">https://doi.org/10.1071/sr14060</a> .                                                                     |
| Lu et al. [5]           | Effect of intensive cropping and salinization on PIC                                   | North China Plain                         | <a href="https://doi.org/10.1016/j.agee.2020.106820">https://doi.org/10.1016/j.agee.2020.106820</a> .                                               |
| Hirmas et al. [9]       | Effect of increasing CO <sub>2</sub> concentration on SIC distribution                 | Southern Fry Mountains, USA               | <a href="https://doi.org/10.1016/j.geoderma.2009.05.005">https://doi.org/10.1016/j.geoderma.2009.05.005</a>                                         |
| Díaz-Hernández [15]     | C contents in deep soil profiles                                                       | Spain                                     | <a href="https://doi.org/10.1016/j.chemosphere.2010.04.038">https://doi.org/10.1016/j.chemosphere.2010.04.038</a>                                   |
| Stone et al. [17]       | C sink in deserts                                                                      | China                                     | <a href="https://doi.org/10.1126/science.320.5882.1409">https://doi.org/10.1126/science.320.5882.1409</a> .                                         |
| Gao et al. [18]         | Effect of vegetation rehabilitation on SOC and SIC content                             | Northwest China                           | <a href="https://doi.org/10.1002/ldr.2832">https://doi.org/10.1002/ldr.2832</a> .                                                                   |
| Gao et al. [18]         | SIC changes along a chronosequence of afforestation                                    | China                                     | <a href="https://doi.org/10.3389/fpls.2017.01282">https://doi.org/10.3389/fpls.2017.01282</a>                                                       |
| Chai et al. [20]        | C emissions in arid croplands                                                          | China                                     | <a href="https://doi.org/10.1007/s13593-013-0161-x">https://doi.org/10.1007/s13593-013-0161-x</a>                                                   |
| Ewing et al. [21]       | Soil factors in arid to hyperarid transitions                                          | Atacama Desert, Northern Chile            | <a href="https://doi.org/10.1016/j.gca.2006.08.020">https://doi.org/10.1016/j.gca.2006.08.020</a>                                                   |
| Schlesinger et al. [25] | C sequestration in deserts                                                             |                                           | <a href="https://doi.org/10.1111/j.1365-2486.2008.01763.x">https://doi.org/10.1111/j.1365-2486.2008.01763.x</a>                                     |
| Nyachoti et al. [29]    | Factors affecting PIC formation                                                        | USA                                       | <a href="https://doi.org/10.1016/j.chemgeo.2017.10.014">https://doi.org/10.1016/j.chemgeo.2017.10.014</a> .                                         |
| Monger et al. [32]      | Biotic process of PIC formation                                                        | New Mexico, USA                           | <a href="https://doi.org/10.1130/0091-7613(1991)019%3C0997:MPOPC%3E2.3.CO;2">https://doi.org/10.1130/0091-7613(1991)019%3C0997:MPOPC%3E2.3.CO;2</a> |
| Marion et al. [34]      | Develop and validate a regional model for CaCO <sub>3</sub> deposition in desert soils | Southwestern United States                | <a href="https://doi.org/10.1097/00010694-198505000-00014">https://doi.org/10.1097/00010694-198505000-00014</a>                                     |
| Zhang et al. [37]       | Role of SOM in PIC formation in desert soils                                           | Inner Mongolia, China                     | <a href="https://doi.org/10.1016/S1002-0160(10)60010-0">https://doi.org/10.1016/S1002-0160(10)60010-0</a>                                           |

|                        |                                                                         |                                                             |                                                                                                                 |
|------------------------|-------------------------------------------------------------------------|-------------------------------------------------------------|-----------------------------------------------------------------------------------------------------------------|
| Sanderman [44]         | Effect of agricultural management on soil carbonate status              | Australia                                                   | <a href="https://doi.org/10.1016/j.agee.2012.04.015">https://doi.org/10.1016/j.agee.2012.04.015</a> .           |
| Lal [45]               | SIC sequestration rate under different climates                         |                                                             | <a href="https://doi.org/10.1002/ldr.934">https://doi.org/10.1002/ldr.934</a>                                   |
| Emmerich [46]          | CO <sub>2</sub> fluxes in high carbonate soils                          | Southeastern Arizona                                        | <a href="https://doi.org/10.1016/S0168-1923(02)00231-9">https://doi.org/10.1016/S0168-1923(02)00231-9</a>       |
| Entry et al. [47]      | Effect of irrigation on SIC content                                     | Snake River Plain, Idaho, USA                               | <a href="https://doi.org/10.1007/s00267-003-9140-3">https://doi.org/10.1007/s00267-003-9140-3</a>               |
| Khokhlova et al. [50]  | Effect of irrigation on the soil carbonate status                       | Russia                                                      | <a href="https://doi.org/10.1016/s0933-3630(96)00134-1">https://doi.org/10.1016/s0933-3630(96)00134-1</a> .     |
| Wohlfahrt et al. [52]  | quantify the uncertainty of eddy covariance measurements of NEE         | Mojave desert, California                                   | <a href="https://doi.org/10.1111/j.1365-2486.2008.01593.x">https://doi.org/10.1111/j.1365-2486.2008.01593.x</a> |
| Kim et al. [54]        | Effects of long-term cultivation of dryland soils on SIC content        | Southern Great Plains, USA and Pampas grasslands, Argentina | <a href="https://doi.org/10.1111/gcb.15207">https://doi.org/10.1111/gcb.15207</a>                               |
| Raheb et al. [55]      | SIC and SOC stock in arid soils                                         | Iran                                                        | <a href="https://doi.org/10.1016/j.catena.2017.01.035">https://doi.org/10.1016/j.catena.2017.01.035</a> .       |
| Wu et al. [57]         | SIC content under different land-use types                              | China                                                       | <a href="https://doi.org/10.1016/j.agee.2008.10.020">https://doi.org/10.1016/j.agee.2008.10.020</a> .           |
| Mi et al. [58]         | SIC storage                                                             | China                                                       | <a href="https://doi.org/10.1111/j.1365-2486.2008.01642.x">https://doi.org/10.1111/j.1365-2486.2008.01642.x</a> |
| Tan et al. [59]        | SIC stock under different soil types                                    | The Loess Plateau region of China                           | <a href="https://doi.org/10.1023/A:1017557712431">https://doi.org/10.1023/A:1017557712431</a>                   |
| Feng et al. [60]       | SIC and SOC content in deserts                                          | Northern People's Republic of China                         | <a href="https://doi.org/10.1023/A:1017557712431">https://doi.org/10.1023/A:1017557712431</a>                   |
| Deng et al. [61]       | Soil C sequestration under different land uses                          | China                                                       | <a href="https://doi.org/10.1111/gcb.12508">https://doi.org/10.1111/gcb.12508</a>                               |
| Hombegowda et al. [62] | SOC stocks along a forest–agriculture–agroforestry trajectory           | South India                                                 | <a href="https://doi.org/10.5194/soil-2-13-2016">https://doi.org/10.5194/soil-2-13-2016</a>                     |
| Chang et al. [63]      | Effects of afforestation on SOC and SIC content                         | China                                                       | <a href="https://doi.org/10.1016/j.catena.2012.02.012">https://doi.org/10.1016/j.catena.2012.02.012</a> .       |
| Jin et al. [64]        | Effect of fertilizer induced soil acidification on SOC and SIC dynamics | China                                                       | <a href="https://doi.org/10.1007/s40333-018-0066-2">https://doi.org/10.1007/s40333-018-0066-2</a>               |
| Rasmussen [66]         | SOC and SIC in different soil taxa                                      | Arizona, USA                                                | <a href="https://doi.org/10.2136/sssaj2005.0118">https://doi.org/10.2136/sssaj2005.0118</a> .                   |

|                        |                                                                                                                           |                                        |                                                                                                             |
|------------------------|---------------------------------------------------------------------------------------------------------------------------|----------------------------------------|-------------------------------------------------------------------------------------------------------------|
| Bughio et al. [68]     | Effect of agricultural practices on SIC and SOC; partitioning SIC into LIC and PIC; identifying pathways of PIC formation | China                                  | <a href="https://doi.org/10.1016/j.geoderma.2015.08.003">https://doi.org/10.1016/j.geoderma.2015.08.003</a> |
| Zhao et al. [70]       | Effect of different vegetation cover on SIC and SOC content                                                               | China                                  | <a href="https://doi.org/10.1016/j.catena.2016.01.003">https://doi.org/10.1016/j.catena.2016.01.003</a>     |
| Woodbury et al. [72]   | Soil C dynamics under different land-use types                                                                            | United States of America               | <a href="https://doi.org/10.1016/j.geoderma.2007.07.007">https://doi.org/10.1016/j.geoderma.2007.07.007</a> |
| Su et al. [74]         | Effects of desert rehabilitation on SOC and SIC content                                                                   | Northwest China                        | <a href="https://doi.org/10.1016/j.jenvman.2009.12.014">https://doi.org/10.1016/j.jenvman.2009.12.014</a>   |
| Lu et al. [75]         | SIC and SOC dynamics in croplands                                                                                         | The Loess Plateau, China               | <a href="http://dx.doi.org/10.21203/rs.3.rs-55467/v1">http://dx.doi.org/10.21203/rs.3.rs-55467/v1</a>       |
| Mikhailova et al. [76] | Land-use effects on SIC content                                                                                           | Kursk, Russia                          | <a href="https://doi.org/10.2134/jeq2005.0151">https://doi.org/10.2134/jeq2005.0151</a>                     |
| Sartori et al. [78]    | SIC along a chronosequence of poplar plantation                                                                           | Oregon, USA                            | <a href="https://doi.org/10.1016/j.agee.2007.01.026">https://doi.org/10.1016/j.agee.2007.01.026</a>         |
| Wang et al. [79]       | SOC and SIC in croplands                                                                                                  | Inner Mongolia                         | <a href="https://doi.org/10.1016/j.catena.2013.04.008">https://doi.org/10.1016/j.catena.2013.04.008</a>     |
| Wang et al. [80]       | Impacts of land use change on PIC dynamics                                                                                | Northwest China                        | <a href="https://doi.org/10.1038/srep11439">https://doi.org/10.1038/srep11439</a>                           |
| Wang et al. [81]       | Effect of organic amendments on carbonate content in arid croplands                                                       | Northern China                         | <a href="https://doi.org/10.1007/s11104-014-2077-x">https://doi.org/10.1007/s11104-014-2077-x</a>           |
| Zhang et al. [82]      | Vertical distribution of SIC and SOC                                                                                      | Lanzhou, China                         | <a href="https://doi.org/10.1016/j.catena.2014.10.031">https://doi.org/10.1016/j.catena.2014.10.031</a>     |
| Denef et al. [85]      | C sequestration under centre-pivot irrigation compared to rainfed conditions                                              | The Central Great Plains, USA          | <a href="https://doi.org/10.1016/j.geoderma.2008.03.002">https://doi.org/10.1016/j.geoderma.2008.03.002</a> |
| Halvorson et al. [86]  | Soil C under limited irrigation                                                                                           | The Central Great Plains, USA          | <a href="https://doi.org/10.2134/agronj2012.0113">https://doi.org/10.2134/agronj2012.0113</a>               |
| Gocke et al. [87]      | Depth-related distribution of secondary carbonate                                                                         | Germany                                | <a href="https://doi.org/10.1029/2010GB003871">https://doi.org/10.1029/2010GB003871</a>                     |
| Raza et al. [91]       | SIC loss due to N-fertilizer induced soil acidification                                                                   | China                                  | <a href="https://doi.org/10.1111/gcb.15101">https://doi.org/10.1111/gcb.15101</a>                           |
| Ramnarine et al. [94]  | Contributions of carbonates to soil CO <sub>2</sub> emissions                                                             | southern Ontario, Canada               | <a href="https://doi.org/10.4141/CJSS2011-025">https://doi.org/10.4141/CJSS2011-025</a>                     |
| Shi et al. [98]        | SIC and SOC in the op soils of grasslands                                                                                 | Inner Mongolia and the Tibetan Plateau | <a href="https://doi.org/10.5194/bg-9-2287-2012">https://doi.org/10.5194/bg-9-2287-2012</a>                 |

|                         |                                                                                                                  |                             |                                                                                                                                               |
|-------------------------|------------------------------------------------------------------------------------------------------------------|-----------------------------|-----------------------------------------------------------------------------------------------------------------------------------------------|
| Jin et al. [100]        | Effects of tree plantation on SOC and SIC sequestration                                                          | China                       | <a href="https://doi.org/10.1016/j.scitotenv.2014.03.105">https://doi.org/10.1016/j.scitotenv.2014.03.105</a>                                 |
| Buyssse et al. [105]    | Effect of long-term residue management on SOC                                                                    | Belgium                     | <a href="http://dx.doi.org/10.1016/j.agee.2013.01.006">http://dx.doi.org/10.1016/j.agee.2013.01.006</a>                                       |
| Jobbágy et al. [108]    | Depth-wise SOC distribution and its relationship with climate and vegetation                                     | Global dataset              | <a href="https://doi.org/10.1890/1051-0761(2000)010[0423:TVDOSO]2.0.CO;2">https://doi.org/10.1890/1051-0761(2000)010[0423:TVDOSO]2.0.CO;2</a> |
| Xie et al. [109]        | CO <sub>2</sub> absorption by alkaline soils                                                                     | Gubantonggut Desert, China  | <a href="https://doi.org/10.1007/s00254-008-1197-0">https://doi.org/10.1007/s00254-008-1197-0</a>                                             |
| Huang et al. [115]      | Effect of phosphorus fertilization on soil C dynamics                                                            | Adana-Turkey                | <a href="https://doi.org/10.1080/00103624.2020.1822381">https://doi.org/10.1080/00103624.2020.1822381</a>                                     |
| Zeng et al. [116]       | Effect of long-term fertilization on SIC and SOC content                                                         | Lanzhou Gansu, China        | <a href="http://en.cnki.com.cn/Article_en/CJFDTot-TRFL200802004.htm">http://en.cnki.com.cn/Article_en/CJFDTot-TRFL200802004.htm</a>           |
| Zhang et al. [119]      | Relationship between soil C and other soil parameters; effect of hydrological processes on soil C dynamics       | The North China Plain       | <a href="https://doi.org/10.1016/j.agee.2020.106886">https://doi.org/10.1016/j.agee.2020.106886</a>                                           |
| Shi et al. [121]        | Spatial distribution of SIC and its relationship with other soil parameters                                      | North China Plain           | <a href="https://doi.org/10.1007/s11104-017-3310-1">https://doi.org/10.1007/s11104-017-3310-1</a>                                             |
| Evans et al. [122]      | Terrestrial C accumulation in desert due to following long term exposure to elevated atmospheric CO <sub>2</sub> | Mojave desert, California   | <a href="https://doi.org/10.1038/nclimate2184">https://doi.org/10.1038/nclimate2184</a>                                                       |
| Ma et al. [123]         | Identifying DIC as a hidden carbon sink in desert                                                                | Gurbantunggut Desert, China | <a href="https://doi.org/10.5194/bg-11-6251-2014">https://doi.org/10.5194/bg-11-6251-2014</a>                                                 |
| Li et al. [124]         | <sup>14</sup> C dating of soil organic/inorganic carbon in desert                                                | Lanzhou, China              | <a href="https://doi.org/10.1002/2015GL064222">https://doi.org/10.1002/2015GL064222</a>                                                       |
| Mielnick et al. [132]   | Soil CO <sub>2</sub> flux in a desert grassland                                                                  | North America               | <a href="https://doi.org/10.1016/j.jaridenv.2004.06.001">https://doi.org/10.1016/j.jaridenv.2004.06.001</a>                                   |
| Inglima et al. [133]    | Contribution of SIC to soil CO <sub>2</sub> efflux                                                               | Pianosa, Italy              | <a href="https://doi.org/10.1111/j.1365-2486.2008.01793.x">https://doi.org/10.1111/j.1365-2486.2008.01793.x</a>                               |
| Xie et al. [134]        | CO <sub>2</sub> absorption by alkaline soils                                                                     | China                       | <a href="https://doi.org/10.1007/s00254-008r-r1197-0">https://doi.org/10.1007/s00254-008r-r1197-0</a>                                         |
| Hamerlynck et al. [135] | Relationship with nocturnal soil CO <sub>2</sub> uptake and subsurface soil C dynamics                           | USA                         | <a href="https://doi.org/10.1002/2013JG002495">https://doi.org/10.1002/2013JG002495</a>                                                       |
| Ball et al. [136]       | Factors affecting CO <sub>2</sub> flux in dry valley soils                                                       | Antarctica                  | <a href="https://doi.org/10.1016/j.soilbio.2009.04.011">https://doi.org/10.1016/j.soilbio.2009.04.011</a>                                     |

|                         |                                                                                                               |                          |                                                                                                               |
|-------------------------|---------------------------------------------------------------------------------------------------------------|--------------------------|---------------------------------------------------------------------------------------------------------------|
| Roland et al. [137]     | Ventilation-driven CO <sub>2</sub> outgassing in carbonate weathering                                         | Spain                    | <a href="https://doi.org/10.5194/bg-10-5009-2013">https://doi.org/10.5194/bg-10-5009-2013</a>                 |
| Breecker et al. [138]   | Seasonal bias in PIC formation                                                                                | New Mexico, USA          | <a href="https://doi.org/10.1130/B26413.1">https://doi.org/10.1130/B26413.1</a>                               |
| Roby et al. [139]       | Effect of gross ecosystem photosynthesis, soil moisture and soil temperature on soil CO <sub>2</sub> flux     | Arizona, USA             | <a href="https://doi.org/10.3390/soilsystems3010006">https://doi.org/10.3390/soilsystems3010006</a>           |
| Soper et al. [140]      | Soil CO <sub>2</sub> emissions from Mojave desert                                                             | Nevada, USA              | <a href="https://doi.org/10.1002/2016GL071198">https://doi.org/10.1002/2016GL071198</a>                       |
| Kowalski et al. [141]   | CO <sub>2</sub> exchange between atmosphere, ecosystems and carbonate substrates                              | Spain                    | <a href="https://doi.org/10.1016/j.agrformet.2008.02.004">https://doi.org/10.1016/j.agrformet.2008.02.004</a> |
| Parsons et al. [142]    | Soil CO <sub>2</sub> flux in McMurdo Dry Valleys                                                              | Antarctica               | <a href="https://doi.org/10.1007/s10021-003-0132-1">https://doi.org/10.1007/s10021-003-0132-1</a>             |
| Plestenjak et al. [143] | Estimation of the contribution of various sources that influence soil CO <sub>2</sub> in calcareous grassland | Slovenia, Central Europe | <a href="https://doi.org/10.1007/s11368-012-0564-3">https://doi.org/10.1007/s11368-012-0564-3</a>             |

\*LIC: lithogenic carbonate, PIC: pedogenic carbonate
